# Supplementary material for: Electrospun Composites Made of Reduced Graphene Oxide and Polyacrylonitrile-Based Activated Carbon Nanofibers (rGO/ACNF) for Enhanced CO2 Adsorption
Source: MDPI journal article supplement (doi:10.3390/polym12092117), 2020-09-17
Supplement: s1 [file s1]

# Electrospun Composites Made of Reduced Graphene Oxide and Polyacrylonitrile-Based Activated Carbon Nanofibers (rGO/ACNF) for Enhanced CO<sub>2</sub> Adsorption

Faten Ermala Che Othman <sup>1</sup>, Norhaniza Yusof <sup>1</sup>, Javier González-Benito <sup>2,\*</sup>, Xiaolei Fan <sup>3</sup> and Ahmad Fauzi Ismail <sup>1</sup>

<sup>1</sup> Advanced Membrane Technology Research Centre (AMTEC), School of Chemical and Energy Engineering, Faculty of Engineering, Universiti Teknologi Malaysia, 81310 Johor Bahru, Malaysia; fermala2@live.utm.my (F.E.C.O.); norhaniza@petroleum.utm.my (N.Y.); afauzi@utm.my (A.F.I.)

<sup>2</sup> Department of Materials Science and Engineering and Chemical Engineering, IQMAAB, Universidad Carlos III de Madrid Avda. Universidad, 15, Leganés, 28911 Madrid, Spain;

<sup>3</sup> Department of Chemical Engineering and Analytical Science, School of Engineering, The University of Manchester, Manchester M13 9PL, UK; xiaolei.fan@manchester.ac.uk

\* Correspondence: javid@ing.uc3m.es

## Supplementary Information

**Table S1.** Dope formulation of gACNFs composite with different concentrations of reduced graphene oxide (rGO).

| Sample     | Concentration of rGO<br>(% relative to PAN wt.) | PAN (% relative to total<br>wt.) | DMF (% relative to total<br>wt.) |
|------------|-------------------------------------------------|----------------------------------|----------------------------------|
| NF         | 0                                               | 8                                | 92                               |
| rGO/NF0.01 | 1                                               | 8                                | 92                               |
| rGO/NF0.05 | 5                                               | 8                                | 92                               |
| rGO/NF0.1  | 10                                              | 8                                | 92                               |

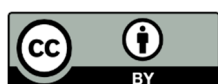

© 2020 by the authors. Licensee MDPI, Basel, Switzerland. This article is an open access article distributed under the terms and conditions of the Creative Commons Attribution (CC BY) license (<http://creativecommons.org/licenses/by/4.0/>).
